# Supplementary material for: A Viral Genome Landscape of RNA Polyadenylation from KSHV Latent to Lytic Infection
Source: PubMed Central journal article supplement (PMC3828183; doi:10.1371/journal.ppat.1003749), 2013-11-14
Supplement: ppat.1003749.s006.pdf [file ppat.1003749.s006.pdf]

| pA site<br>(strand) | PA peak |        |          |
|---------------------|---------|--------|----------|
|                     | Start   | End    | Usage    |
| 2972 (+)            | 2964    | 2982   | 14567    |
| 7032 (+)            | 7021    | 7045   | 29860    |
| 17073 (+)           | 17061   | 17099  | 163490   |
| 25116 (+)           | 25105   | 25139  | 38623    |
| 25192 (+)           | 25191   | 25198  | 4039     |
| 25441 (+)           | 25424   | 25472  | 425475   |
| 28925 (+)           | 28921   | 28929  | 3373     |
| 29277 (+)           | 29275   | 29282  | 3563     |
| 29740 (+)           | 29682   | 29780  | 29882191 |
| 30749 (+)           | 30743   | 30756  | 7324     |
| 33455 (+)           | 33452   | 33458  | 3028     |
| 39329 (+)           | 39324   | 39342  | 10781    |
| 48779 (+)           | 48761   | 48790  | 35939    |
| 54095 (+)           | 54088   | 54107  | 15154    |
| 58875 (+)           | 58862   | 58892  | 134808   |
| 62559 (+)           | 62553   | 62569  | 11015    |
| 67318 (+)           | 67313   | 67325  | 6793     |
| 76738 (+)           | 76723   | 76764  | 245562   |
| 78708 (+)           | 78702   | 78718  | 9997     |
| 78777 (+)           | 78764   | 78788  | 32236    |
| 83636 (+)           | 83619   | 83655  | 158045   |
| 111911 (+)          | 111904  | 111917 | 6560     |
| 117421 (+)          | 117411  | 117436 | 33623    |
| 130545 (+)          | 130534  | 130557 | 34135    |
| 10572 (-)           | 10568   | 10573  | 359      |
| 17181 (-)           | 17163   | 17200  | 229215   |
| 17227 (-)           | 17226   | 17229  | 387      |
| 18593 (-)           | 18576   | 18611  | 117252   |
| 21326 (-)           | 21307   | 21345  | 330954   |
| 25547 (-)           | 25529   | 25562  | 43067    |
| 26892 (-)           | 26876   | 26909  | 54254    |
| 29376 (-)           | 29367   | 29379  | 471      |
| 29447 (-)           | 29423   | 29461  | 17166    |
| 29516 (-)           | 29475   | 29531  | 39274    |
| 29558 (-)           | 29544   | 29585  | 61203    |
| 29615 (-)           | 29607   | 29625  | 1914     |
| 30741 (-)           | 30723   | 30761  | 87763    |
| 32518 (-)           | 32512   | 32523  | 768      |
| 36119 (-)           | 36114   | 36128  | 916      |
| 39229 (-)           | 39216   | 39243  | 14895    |
| 49344 (-)           | 49332   | 49352  | 2037     |
| 55654 (-)           | 55645   | 55658  | 858      |
| 58884 (-)           | 58863   | 58903  | 50571    |
| 62410 (-)           | 62399   | 62432  | 10982    |
| 67323 (-)           | 67306   | 67345  | 146698   |
| 71615 (-)           | 71598   | 71629  | 18081    |
| 73485 (-)           | 73478   | 73496  | 1577     |
| 74635 (-)           | 74628   | 74641  | 923      |
| 76706 (-)           | 76690   | 76725  | 64325    |
| 78704 (-)           | 78690   | 78723  | 27327    |
| 83787 (-)           | 83771   | 83808  | 78415    |
| 83844 (-)           | 83841   | 83848  | 571      |
| 86005 (-)           | 85990   | 86022  | 26076    |
| 89372 (-)           | 89358   | 89386  | 11103    |
| 89516 (-)           | 89506   | 89525  | 2254     |
| 91750 (-)           | 91739   | 91764  | 5230     |
| 91873 (-)           | 91868   | 91878  | 654      |
| 94467 (-)           | 94445   | 94487  | 401925   |
| 98274 (-)           | 98264   | 98286  | 3986     |
| 111807 (-)          | 111787  | 111824 | 98477    |
| 117430 (-)          | 117397  | 117458 | 1078460  |
| 117868 (-)          | 117818  | 117890 | 27010    |
| 118012 (-)          | 117997  | 118022 | 3893     |
| 118032 (-)          | 118026  | 118038 | 767      |
| 118087 (-)          | 118067  | 118102 | 4998     |
| 122069 (-)          | 122055  | 122083 | 12021    |
| 130492 (-)          | 130470  | 130502 | 5036     |

**Table S1**
