# Supplementary material for: A Viral Genome Landscape of RNA Polyadenylation from KSHV Latent to Lytic Infection
Source: PubMed Central journal article supplement (PMC3828183; doi:10.1371/journal.ppat.1003749), 2013-11-14
Supplement: ppat.1003749.s007.pdf [file ppat.1003749.s007.pdf]

| Gene     | Strand | pA site-position (nt) |        | Reference |
|----------|--------|-----------------------|--------|-----------|
|          |        | Reported              | PA-seq |           |
| T1.5 RNA | +      | 25440                 | 25441  | [34]      |
| PAN      | +      | 29741                 | 29740  | [8]       |
| ORF57    | +      | 83608                 | 83636  | [39]      |
| ORF45    | -      | 67325                 | 67323  | [38]      |
| ORF58    | -      | 94469/94477           | 94467  | [39]      |
| K12      | -      | 117432                | 117430 | [40]      |
| K13      | -      | 122060                | 122069 | [41]      |
| ORF74    | -      | 130545                | 130545 | [42]      |
