# Supplementary material for: A Viral Genome Landscape of RNA Polyadenylation from KSHV Latent to Lytic Infection
Source: PubMed Central journal article supplement (PMC3828183; doi:10.1371/journal.ppat.1003749), 2013-11-14
Supplement: ppat.1003749.s008.pdf [file ppat.1003749.s008.pdf]

| pA site (strand) | Gene/gene cluster     | # of genes/pA | Adjacent gene | 3UTR      |
|------------------|-----------------------|---------------|---------------|-----------|
| 2972 (+)         | K1, ORF4              | 2             | ORF4          | 178       |
| 7032 (+)         | ORF6                  | 1             | ORF6          | 421       |
| 17073 (+)        | ORF7, 8, 9, 10, 11    | 5             | ORF11         | 60        |
| 25116 (+)        | T1.5                  | 1             | T1.5          | N/A       |
| 25192 (+)        | T1.5                  | 1             | T1.5          | N/A       |
| 25441 (+)        | T1.5                  | 1             | T1.5          | N/A       |
| 28925 (+)        | K7, PAN, T6.1         | 3             | PAN           | N/A       |
| 29277 (+)        | K7, PAN, T6.1         | 3             | K7            | 275       |
| 29740 (+)        | K7, PAN, T6.1         | 3             | K7            | 738       |
| 30749 (+)        | ORF16                 | 1             | ORF16         | 77        |
| 33455 (+)        | ORF18                 | 1             | ORF18         | 258       |
| 39329 (+)        | ORF21, 22             | 2             | ORF22         | 24        |
| 48779 (+)        | ORF25, 26, 27         | 3             | ORF27         | 34        |
| 54095 (+)        | ORF28, 30, 31, 32, 33 | 5             | ORF33         | 396       |
| 58875 (+)        | ORF34, 35, 36, 37, 38 | 5             | ORF38         | 2         |
| 62559 (+)        | ORF40, 41             | 2             | ORF41         | 115       |
| 67318 (+)        | ORF44                 | 1             | ORF44         | 60        |
| 76738 (+)        | ORF50, K8, K8.1       | 3             | K8.1          | 43        |
| 78708 (+)        | ORF54                 | 1             | ORF54         | 85        |
| 78777 (+)        | ORF54                 | 1             | ORF54         | 154       |
| 83636 (+)        | ORF56, 57             | 2             | ORF57         | 92        |
| 111911 (+)       | ORF63, 64             | 2             | ORF64         | 4         |
| 117421 (+)       | ORF68, 69             | 2             | ORF69         | 75        |
| 130545 (+)       | K14, ORF74, altRNA    | 3             | ORF74         | 145       |
| 10572 (-)        | N/A                   | 0             | N/A           | N/A       |
| 17181 (-)        | ORF2, K2              | 2             | viL6          | 80        |
| 17227 (-)        | ORF2, K2              | 2             | viL6          | 34        |
| 18593 (-)        | ORF70, K3             | 2             | K3            | 15        |
| 21326 (-)        | K4.2, K4.1, K4        | 3             | K4            | 222       |
| 25547 (-)        | K5                    | 1             | K5            | 166       |
| 26892 (-)        | K6                    | 1             | K6            | 245       |
| 29376 (-)        | N/A                   | 0             | vnct rep      | N/A       |
| 29447 (-)        | N/A                   | 0             | vntc rep      | N/A       |
| 29516 (-)        | N/A                   | 0             | vnct rep      | N/A       |
| 29558 (-)        | N/A                   | 0             | vntc rep      | N/A       |
| 29615 (-)        | N/A                   | 0             | vnct rep      | N/A       |
| 30741 (-)        | ORF17                 | 1             | ORF17         | 80        |
| 32518 (-)        | ORF20, 19             | 2             | ORF19         | 676       |
| 36119 (-)        | N/A                   | 0             | N/A           | N/A       |
| 39229 (-)        | ORF24, 23             | 2             | ORF23         | 73        |
| 49344 (-)        | ORF29a, 29            | 2             | ORF29         | 18        |
| 55654 (-)        | N/A                   | 0             | N/A           | N/A       |
| 58884 (-)        | ORF39                 | 1             | ORF39         | 89        |
| 62410 (-)        | ORF43, 42             | 2             | ORF42         | 26        |
| 67323 (-)        | ORF48, 47, 46, 45     | 4             | ORF45         | 30        |
| 71615 (-)        | asORF50S, ORF49       | 2             | ORF49         | 15        |
| 73485 (-)        | asORF50S              | 1             | asORF50S      | N/A       |
| 74635 (-)        | N/A                   | 0             | N/A           | N/A       |
| 76706 (-)        | ORF53, 52             | 2             | ORF52         | 96        |
| 78704 (-)        | ORF55                 | 1             | ORF55         | 61        |
| 83787 (-)        | K9                    | 1             | K9            | 73        |
| 83844 (-)        | K9                    | 1             | K9 alt        | 16        |
| 86005 (-)        | K10.1, K10            | 2             | K10           | 69        |
| 89372 (-)        | K10.6, K10.5          | 2             | K10.5         | 228       |
| 89516 (-)        | K10.6, K10.5          | 2             | K10.5 alt     | 84        |
| 91750 (-)        | K11.1, K11            | 2             | K11           | 214       |
| 91873 (-)        | K11.1, K11            | 2             | K11 alt       | 91        |
| 94467 (-)        | ORF62, 61, 60, 59, 58 | 5             | ORF58         | 4         |
| 98274 (-)        | ORF62                 | 1             | ORF62         | 1925      |
| 111807 (-)       | ORF67, 66, 65         | 3             | ORF65         | 124       |
| 117430 (-)       | K12                   | 1             | K12           | 489       |
| 117868 (-)       | K12                   | 1             | K12           | 51        |
| 118012 (-)       | N/A                   | 0             | K12 internal  | N/A       |
| 118032 (-)       | N/A                   | 0             | K12 internal  | N/A       |
| 118087 (-)       | N/A                   | 0             | K12 internal  | N/A       |
| 122069 (-)       | ORF73, 12, K13        | 3             | K13           | 76        |
| 130492 (-)       | K15, ORF75            | 2             | ORF75         | 59        |
|                  | <b>Median</b>         | <b>2</b>      | <b>Median</b> | <b>80</b> |

Table S3
