# Supplementary material for: A Viral Genome Landscape of RNA Polyadenylation from KSHV Latent to Lytic Infection
Source: PubMed Central journal article supplement (PMC3828183; doi:10.1371/journal.ppat.1003749), 2013-11-14
Supplement: ppat.1003749.s009.pdf [file ppat.1003749.s009.pdf]

| <b>Gene (total reads)</b>  | <b>pA sites</b> | <b>Reads count</b> | <b>Use (%)</b> |
|----------------------------|-----------------|--------------------|----------------|
| <b>T1.5 (468137)</b>       | 25116 (+)       | 38623              | <b>8.2</b>     |
|                            | 25192 (+)       | 4039               | <b>0.9</b>     |
|                            | 25441 (+)       | 425475             | <b>90.9</b>    |
| <b>PAN (29889127)</b>      | 28925 (+)       | 3373               | <b>&lt;0.1</b> |
|                            | 29277 (+)       | 3563               | <b>&lt;0.1</b> |
|                            | 29740 (+)       | 29882191           | <b>100.0</b>   |
| <b>ORF54 (42233)</b>       | 78708 (+)       | 9997               | <b>23.7</b>    |
|                            | 78777 (+)       | 32236              | <b>76.3</b>    |
| <b>vIL6 (229602)</b>       | 17181 (-)       | 229215             | <b>99.8</b>    |
|                            | 17227 (-)       | 387                | <b>0.2</b>     |
| <b>vnct rep (120028)</b>   | 29376 (-)       | 471                | <b>0.4</b>     |
|                            | 29447 (-)       | 17166              | <b>14.3</b>    |
|                            | 29516 (-)       | 39274              | <b>32.7</b>    |
|                            | 29558 (-)       | 61203              | <b>51.0</b>    |
|                            | 29615 (-)       | 1914               | <b>1.6</b>     |
| <b>K9 (78986)</b>          | 83787 (-)       | 78415              | <b>99.3</b>    |
|                            | 83844 (-)       | 571                | <b>0.7</b>     |
| <b>K10.5 (13357)</b>       | 89372 (-)       | 11103              | <b>83.1</b>    |
|                            | 89516 (-)       | 2254               | <b>16.9</b>    |
| <b>K11 (5884)</b>          | 91750 (-)       | 5230               | <b>88.9</b>    |
|                            | 91873 (-)       | 654                | <b>11.1</b>    |
| <b>K12 (1105470)</b>       | 117430 (-)      | 1078460            | <b>97.6</b>    |
|                            | 117868 (-)      | 27010              | <b>2.4</b>     |
| <b>K12 internal (9656)</b> | 118012 (-)      | 3893               | <b>40.3</b>    |
|                            | 118032 (-)      | 767                | <b>7.9</b>     |
|                            | 118087 (-)      | 4998               | <b>51.8</b>    |
