# Supplementary material for: A Viral Genome Landscape of RNA Polyadenylation from KSHV Latent to Lytic Infection
Source: PubMed Central journal article supplement (PMC3828183; doi:10.1371/journal.ppat.1003749), 2013-11-14
Supplement: ppat.1003749.s010.pdf [file ppat.1003749.s010.pdf]

| pA site    | Usage (normalized to million mapped reads) |          |        |          |             |          |
|------------|--------------------------------------------|----------|--------|----------|-------------|----------|
|            | JSC-1                                      |          | BCBL-1 |          | TReX BCBL-1 |          |
|            | Latent                                     | Lytic    | Latent | Lytic    | Latent      | Lytic    |
| 2972 (+)   | 1.5                                        | 49.9     | 4.1    | 66.8     | 18.4        | 503.4    |
| 7032 (+)   | 0.0                                        | 114.1    | 1.7    | 369.0    | 11.4        | 860.8    |
| 17073 (+)  | 5.9                                        | 1305.2   | 29.3   | 1626.6   | 90.1        | 4688.7   |
| 25116 (+)  | 31.5                                       | 121.7    | 3.9    | 88.6     | 6.9         | 1445.3   |
| 25192 (+)  | 1.2                                        | 10.7     | 0.2    | 4.5      | 0.5         | 157.3    |
| 25441 (+)  | 11.5                                       | 618.8    | 98.8   | 1872.8   | 157.0       | 15544.6  |
| 28925 (+)  | 0.0                                        | 131.1    | 0.0    | 49.7     | 0.7         | 36.0     |
| 29277 (+)  | 0.0                                        | 19.7     | 0.2    | 125.2    | 0.0         | 33.0     |
| 29740 (+)  | 52.5                                       | 227575.2 | 3331.2 | 503546.4 | 3569.6      | 702486.3 |
| 30749 (+)  | 0.0                                        | 78.3     | 0.5    | 105.8    | 1.1         | 176.4    |
| 33455 (+)  | 0.0                                        | 12.0     | 0.2    | 16.3     | 0.5         | 105.5    |
| 39329 (+)  | 0.0                                        | 241.1    | 0.7    | 25.5     | 1.1         | 311.0    |
| 48779 (+)  | 0.1                                        | 397.3    | 34.0   | 126.8    | 4.3         | 1190.5   |
| 54095 (+)  | 0.2                                        | 184.3    | 1.2    | 68.0     | 2.6         | 481.0    |
| 58875 (+)  | 0.5                                        | 861.9    | 6.7    | 602.2    | 9.6         | 4658.5   |
| 62559 (+)  | 2.9                                        | 154.8    | 2.9    | 59.6     | 2.5         | 328.6    |
| 67318 (+)  | 0.0                                        | 118.5    | 0.1    | 11.3     | 0.6         | 215.8    |
| 76738 (+)  | 4.8                                        | 664.0    | 146.6  | 2026.0   | 225.2       | 7864.9   |
| 78708 (+)  | 0.0                                        | 59.2     | 0.1    | 150.9    | 1.8         | 257.6    |
| 78777 (+)  | 0.0                                        | 202.3    | 2.3    | 430.9    | 12.0        | 865.3    |
| 83636 (+)  | 0.3                                        | 6757.4   | 12.0   | 2023.6   | 18.9        | 1665.9   |
| 111911 (+) | 0.0                                        | 155.4    | 0.3    | 13.1     | 1.8         | 186.1    |
| 117421 (+) | 0.1                                        | 730.7    | 1.6    | 158.6    | 2.7         | 914.2    |
| 130545 (+) | 0.3                                        | 152.5    | 7.7    | 561.4    | 6.4         | 860.1    |
| 10572 (-)  | 0.0                                        | 4.3      | 0.0    | 0.6      | 0.1         | 12.2     |
| 17181 (-)  | 914.3                                      | 5975.2   | 177.2  | 5590.4   | 607.2       | 951.6    |
| 17227 (-)  | 0.9                                        | 3.0      | 0.2    | 14.7     | 0.2         | 1.6      |
| 18593 (-)  | 1.2                                        | 444.8    | 12.2   | 841.2    | 26.7        | 3906.5   |
| 21326 (-)  | 11.8                                       | 2917.6   | 26.9   | 8330.1   | 61.9        | 5260.9   |
| 25547 (-)  | 8.0                                        | 587.9    | 31.6   | 1436.7   | 66.4        | 219.6    |
| 26892 (-)  | 4.3                                        | 685.2    | 11.1   | 1457.9   | 24.5        | 670.5    |
| 29376 (-)  | 0.0                                        | 5.5      | 0.1    | 12.0     | 0.0         | 6.8      |
| 29447 (-)  | 0.0                                        | 164.1    | 4.4    | 320.3    | 2.1         | 360.7    |
| 29516 (-)  | 0.0                                        | 401.6    | 7.5    | 656.6    | 5.5         | 877.6    |
| 29558 (-)  | 0.0                                        | 294.3    | 6.1    | 668.7    | 7.1         | 1824.1   |
| 29615 (-)  | 0.0                                        | 1.5      | 0.1    | 8.3      | 0.5         | 71.0     |
| 30741 (-)  | 0.1                                        | 556.4    | 3.7    | 231.9    | 10.3        | 3166.1   |
| 32518 (-)  | 0.0                                        | 11.5     | 0.1    | 0.1      | 0.0         | 26.3     |
| 36119 (-)  | 0.0                                        | 38.3     | 0.0    | 0.5      | 0.0         | 19.6     |
| 39229 (-)  | 0.0                                        | 313.6    | 0.3    | 28.0     | 1.0         | 445.6    |
| 49344 (-)  | 0.1                                        | 13.5     | 0.6    | 13.6     | 0.4         | 65.9     |
| 55654 (-)  | 0.0                                        | 53.3     | 0.0    | 1.0      | 0.0         | 9.8      |
| 58884 (-)  | 0.7                                        | 2352.9   | 3.9    | 160.1    | 5.4         | 853.8    |
| 62410 (-)  | 0.0                                        | 110.2    | 1.4    | 35.5     | 1.7         | 371.0    |
| 67323 (-)  | 10.6                                       | 827.8    | 54.9   | 2840.3   | 85.2        | 3187.2   |
| 71615 (-)  | 1.4                                        | 59.5     | 39.5   | 287.0    | 29.7        | 431.8    |
| 73485 (-)  | 0.3                                        | 5.0      | 6.6    | 38.2     | 8.5         | 19.4     |
| 74635 (-)  | 0.0                                        | 14.5     | 0.2    | 3.8      | 0.3         | 27.9     |
| 76706 (-)  | 0.2                                        | 233.0    | 4.3    | 433.5    | 19.2        | 2168.8   |
| 78704 (-)  | 0.1                                        | 702.7    | 0.5    | 107.7    | 3.9         | 708.7    |
| 83787 (-)  | 4.2                                        | 165.2    | 44.6   | 1031.4   | 77.7        | 2204.9   |
| 83844 (-)  | 0.2                                        | 6.1      | 0.2    | 5.5      | 0.2         | 15.8     |
| 86005 (-)  | 4.7                                        | 208.7    | 7.0    | 87.3     | 15.1        | 888.7    |
| 89372 (-)  | 62.7                                       | 264.7    | 15.3   | 20.9     | 23.9        | 261.7    |
| 89516 (-)  | 4.9                                        | 138.0    | 0.6    | 3.1      | 1.0         | 23.0     |
| 91750 (-)  | 3.4                                        | 77.7     | 1.6    | 8.2      | 4.4         | 167.0    |
| 91873 (-)  | 0.0                                        | 14.4     | 0.0    | 1.1      | 0.2         | 19.3     |
| 94467 (-)  | 0.8                                        | 5101.4   | 19.9   | 3161.5   | 88.8        | 11504.2  |
| 98274 (-)  | 0.0                                        | 40.6     | 0.0    | 5.0      | 0.1         | 141.7    |
| 111807 (-) | 0.1                                        | 781.9    | 3.9    | 256.0    | 14.5        | 3479.9   |
| 117430 (-) | 31.3                                       | 6753.4   | 268.6  | 9848.0   | 86.7        | 32984.4  |
| 117868 (-) | 0.0                                        | 129.0    | 1.9    | 268.0    | 0.5         | 831.0    |
| 118012 (-) | 0.0                                        | 5.1      | 0.5    | 155.9    | 0.1         | 27.4     |
| 118032 (-) | 0.4                                        | 20.2     | 0.7    | 13.9     | 0.1         | 10.1     |
| 118087 (-) | 0.0                                        | 30.7     | 1.2    | 200.1    | 0.1         | 23.8     |
| 122069(-)  | 53.4                                       | 56.0     | 90.9   | 136.0    | 56.1        | 237.7    |
| 130492 (-) | 9.6                                        | 35.9     | 22.9   | 32.2     | 17.6        | 133.0    |

Table S5
