# Supplementary material for: A Viral Genome Landscape of RNA Polyadenylation from KSHV Latent to Lytic Infection
Source: PubMed Central journal article supplement (PMC3828183; doi:10.1371/journal.ppat.1003749), 2013-11-14
Supplement: ppat.1003749.s011.pdf [file ppat.1003749.s011.pdf]

| pA site<br>(strand) | Usage (normalized to million mapped reads) |                   |                |               | Fold<br>(lytic /latent) |
|---------------------|--------------------------------------------|-------------------|----------------|---------------|-------------------------|
|                     | Latent                                     | Lytic             | Latent (log10) | Lytic (log10) |                         |
| 2972 (+)            | 24.0                                       | 620.1             | 1.4            | 2.8           | 25.8                    |
| 7032 (+)            | 13.2                                       | 1343.9            | 1.1            | 3.1           | 102.1                   |
| 17073 (+)           | 125.3                                      | 7620.5            | 2.1            | 3.9           | 60.8                    |
| 25116 (+)           | 42.3                                       | 1655.6            | 1.6            | 3.2           | 39.2                    |
| 25192 (+)           | 1.9                                        | 172.5             | 0.3            | 2.2           | 92.8                    |
| 25441 (+)           | 267.4                                      | 18036.1           | 2.4            | 4.3           | 67.5                    |
| 28925 (+)           | 0.7                                        | 216.8             | -0.1           | 2.3           | 292.6                   |
| 29277 (+)           | 0.2                                        | 177.9             | -0.8           | 2.3           | 1022.3                  |
| 29740 (+)           | 6953.2                                     | 1433608.0         | 3.8            | 6.2           | 206.2                   |
| 30749 (+)           | 1.7                                        | 360.5             | 0.2            | 2.6           | 217.7                   |
| 33455 (+)           | 0.7                                        | 133.8             | -0.2           | 2.1           | 204.7                   |
| 39329 (+)           | 1.8                                        | 577.5             | 0.3            | 2.8           | 315.7                   |
| 48779 (+)           | 38.4                                       | 1714.7            | 1.6            | 3.2           | 44.6                    |
| 54095 (+)           | 4.0                                        | 733.2             | 0.6            | 2.9           | 184.1                   |
| 58875 (+)           | 16.8                                       | 6122.5            | 1.2            | 3.8           | 364.1                   |
| 62559 (+)           | 8.3                                        | 543.0             | 0.9            | 2.7           | 65.4                    |
| 67318 (+)           | 0.7                                        | 345.6             | -0.2           | 2.5           | 528.7                   |
| 76738 (+)           | 376.7                                      | 10554.8           | 2.6            | 4.0           | 28.0                    |
| 78708 (+)           | 1.9                                        | 467.7             | 0.3            | 2.7           | 249.5                   |
| 78777 (+)           | 14.2                                       | 1498.4            | 1.2            | 3.2           | 105.2                   |
| 83636 (+)           | 31.2                                       | 10446.8           | 1.5            | 4.0           | 335.1                   |
| 111911 (+)          | 2.1                                        | 354.6             | 0.3            | 2.5           | 169.5                   |
| 117421 (+)          | 4.3                                        | 1803.5            | 0.6            | 3.3           | 417.3                   |
| 130545 (+)          | 14.4                                       | 1573.9            | 1.2            | 3.2           | 109.6                   |
| 10572 (-)           | 0.1                                        | 17.1              | -0.9           | 1.2           | 130.8                   |
| 17181 (-)           | 1698.7                                     | 12517.2           | 3.2            | 4.1           | 7.4                     |
| 17227 (-)           | 1.3                                        | 19.3              | 0.1            | 1.3           | 15.3                    |
| 18593 (-)           | 40.0                                       | 5192.5            | 1.6            | 3.7           | 129.7                   |
| 21326 (-)           | 100.6                                      | 16508.6           | 2.0            | 4.2           | 164.0                   |
| 25547 (-)           | 106.1                                      | 2244.3            | 2.0            | 3.4           | 21.2                    |
| 26892 (-)           | 39.9                                       | 2813.6            | 1.6            | 3.4           | 70.4                    |
| 29376 (-)           | 0.1                                        | 24.3              | -1.1           | 1.4           | 279.4                   |
| 29447 (-)           | 6.5                                        | 845.1             | 0.8            | 2.9           | 129.4                   |
| 29516 (-)           | 13.0                                       | 1935.8            | 1.1            | 3.3           | 148.7                   |
| 29558 (-)           | 13.2                                       | 2787.1            | 1.1            | 3.4           | 210.5                   |
| 29615 (-)           | 0.6                                        | 80.8              | -0.2           | 1.9           | 132.4                   |
| 30741 (-)           | 14.1                                       | 3954.3            | 1.2            | 3.6           | 279.9                   |
| 32518 (-)           | 0.1                                        | 37.9              | -1.1           | 1.6           | 435.7                   |
| 36119 (-)           | 0.0                                        | 58.4              | N/A            | 1.8           | N/A                     |
| 39229 (-)           | 1.4                                        | 787.1             | 0.1            | 2.9           | 582.8                   |
| 49344 (-)           | 1.1                                        | 93.0              | 0.0            | 2.0           | 84.7                    |
| 55654 (-)           | 0.0                                        | 64.1              | N/A            | 1.8           | N/A                     |
| 58884 (-)           | 10.0                                       | 3366.9            | 1.0            | 3.5           | 335.3                   |
| 62410 (-)           | 3.1                                        | 516.7             | 0.5            | 2.7           | 164.8                   |
| 67323 (-)           | 150.7                                      | 6855.3            | 2.2            | 3.8           | 45.5                    |
| 71615 (-)           | 70.6                                       | 778.3             | 1.8            | 2.9           | 11.0                    |
| 73485 (-)           | 15.4                                       | 62.6              | 1.2            | 1.8           | 4.1                     |
| 74635 (-)           | 0.5                                        | 46.2              | -0.3           | 1.7           | 96.3                    |
| 76706 (-)           | 23.6                                       | 2835.3            | 1.4            | 3.5           | 120.0                   |
| 78704 (-)           | 4.5                                        | 1519.2            | 0.7            | 3.2           | 334.5                   |
| 83787 (-)           | 126.4                                      | 3401.4            | 2.1            | 3.5           | 26.9                    |
| 83844 (-)           | 0.5                                        | 27.4              | -0.3           | 1.4           | 50.6                    |
| 86005 (-)           | 26.9                                       | 1184.8            | 1.4            | 3.1           | 44.1                    |
| 89372 (-)           | 101.9                                      | 547.3             | 2.0            | 2.7           | 5.4                     |
| 89516 (-)           | 6.5                                        | 164.1             | 0.8            | 2.2           | 25.1                    |
| 91750 (-)           | 9.4                                        | 252.8             | 1.0            | 2.4           | 27.0                    |
| 91873 (-)           | 0.2                                        | 34.7              | -0.8           | 1.5           | 199.3                   |
| 94467 (-)           | 109.5                                      | 19767.1           | 2.0            | 4.3           | 180.6                   |
| 98274 (-)           | 0.1                                        | 187.3             | -0.9           | 2.3           | 1432.4                  |
| 111807 (-)          | 18.5                                       | 4517.8            | 1.3            | 3.7           | 243.8                   |
| 117430 (-)          | 386.5                                      | 49585.8           | 2.6            | 4.7           | 128.3                   |
| 117868 (-)          | 2.4                                        | 1228.1            | 0.4            | 3.1           | 503.9                   |
| 118012 (-)          | 0.6                                        | 188.5             | -0.2           | 2.3           | 309.3                   |
| 118032 (-)          | 1.2                                        | 44.2              | 0.1            | 1.6           | 37.7                    |
| 118087 (-)          | 1.3                                        | 254.6             | 0.1            | 2.4           | 195.0                   |
| 122069(-)           | 200.5                                      | 429.7             | 2.3            | 2.6           | 2.1                     |
| 130492 (-)          | 50.1                                       | 201.0             | 1.7            | 2.3           | 4.0                     |
| <b>Total</b>        | <b>11303.20</b>                            | <b>1648659.57</b> |                |               | <b>145.86</b>           |

**Table S6**
