# Supplementary material for: A Viral Genome Landscape of RNA Polyadenylation from KSHV Latent to Lytic Infection
Source: PubMed Central journal article supplement (PMC3828183; doi:10.1371/journal.ppat.1003749), 2013-11-14
Supplement: ppat.1003749.s012.pdf [file ppat.1003749.s012.pdf]

| pA site<br>(strand) | PA peak size/usage |                          |          |                           | Category |
|---------------------|--------------------|--------------------------|----------|---------------------------|----------|
|                     | size (nt)          | size (log <sub>2</sub> ) | usage    | usage (log <sub>2</sub> ) |          |
| 2972 (+)            | 18                 | 4.2                      | 14567    | 13.8                      | NP       |
| 7032 (+)            | 24                 | 4.6                      | 29860    | 14.9                      | NP       |
| 17073 (+)           | 38                 | 5.2                      | 163490   | 17.3                      | BP       |
| 25116 (+)           | 34                 | 5.1                      | 38623    | 15.2                      | BP       |
| 25192 (+)           | 7                  | 2.8                      | 4039     | 12.0                      | NP       |
| 25441 (+)           | 48                 | 5.6                      | 425475   | 18.7                      | WP       |
| 28925 (+)           | 8                  | 3.0                      | 3373     | 11.7                      | NP       |
| 29277 (+)           | 7                  | 2.8                      | 3563     | 11.8                      | NP       |
| 29740 (+)           | 98                 | 6.6                      | 29882191 | 24.8                      | WP       |
| 30749 (+)           | 13                 | 3.7                      | 7324     | 12.8                      | NP       |
| 33455 (+)           | 6                  | 2.6                      | 3028     | 11.6                      | NP       |
| 39329 (+)           | 18                 | 4.2                      | 10781    | 13.4                      | NP       |
| 48779 (+)           | 29                 | 4.9                      | 35939    | 15.1                      | NP       |
| 54095 (+)           | 19                 | 4.2                      | 15154    | 13.9                      | NP       |
| 58875 (+)           | 30                 | 4.9                      | 134808   | 17.0                      | NP       |
| 62559 (+)           | 16                 | 4.0                      | 11015    | 13.4                      | NP       |
| 67318 (+)           | 12                 | 3.6                      | 6793     | 12.7                      | NP       |
| 76738 (+)           | 41                 | 5.4                      | 245562   | 17.9                      | BP       |
| 78708 (+)           | 16                 | 4.0                      | 9997     | 13.3                      | NP       |
| 78777 (+)           | 24                 | 4.6                      | 32236    | 15.0                      | NP       |
| 83636 (+)           | 36                 | 5.2                      | 158045   | 17.3                      | BP       |
| 111911 (+)          | 13                 | 3.7                      | 6560     | 12.7                      | NP       |
| 117421 (+)          | 25                 | 4.6                      | 33623    | 15.0                      | NP       |
| 130545 (+)          | 23                 | 4.5                      | 34135    | 15.1                      | NP       |
| 10572 (-)           | 5                  | 2.3                      | 359      | 8.5                       | NP       |
| 17181 (-)           | 37                 | 5.2                      | 229215   | 17.8                      | BP       |
| 17227 (-)           | 3                  | 1.6                      | 387      | 8.6                       | NP       |
| 18593 (-)           | 35                 | 5.1                      | 117252   | 16.8                      | BP       |
| 21326 (-)           | 38                 | 5.2                      | 330954   | 18.3                      | BP       |
| 25547 (-)           | 33                 | 5.0                      | 43067    | 15.4                      | BP       |
| 26892 (-)           | 33                 | 5.0                      | 54254    | 15.7                      | BP       |
| 29376 (-)           | 12                 | 3.6                      | 471      | 8.9                       | NP       |
| 29447 (-)           | 38                 | 5.2                      | 17166    | 14.1                      | BP       |
| 29516 (-)           | 56                 | 5.8                      | 39274    | 15.3                      | WP       |
| 29558 (-)           | 41                 | 5.4                      | 61203    | 15.9                      | BP       |
| 29615 (-)           | 18                 | 4.2                      | 1914     | 10.9                      | NP       |
| 30741 (-)           | 38                 | 5.2                      | 87763    | 16.4                      | BP       |
| 32518 (-)           | 11                 | 3.5                      | 768      | 9.6                       | NP       |
| 36119 (-)           | 14                 | 3.8                      | 916      | 9.8                       | NP       |
| 39229 (-)           | 27                 | 4.8                      | 14895    | 13.9                      | NP       |
| 49344 (-)           | 20                 | 4.3                      | 2037     | 11.0                      | NP       |
| 55654 (-)           | 13                 | 3.7                      | 858      | 9.7                       | NP       |
| 58884 (-)           | 40                 | 5.3                      | 50571    | 15.6                      | BP       |
| 62410 (-)           | 33                 | 5.0                      | 10982    | 13.4                      | BP       |
| 67323 (-)           | 39                 | 5.3                      | 146698   | 17.2                      | BP       |
| 71615 (-)           | 31                 | 5.0                      | 18081    | 14.1                      | BP       |
| 73485 (-)           | 18                 | 4.2                      | 1577     | 10.6                      | NP       |
| 74635 (-)           | 13                 | 3.7                      | 923      | 9.9                       | NP       |
| 76706 (-)           | 35                 | 5.1                      | 64325    | 16.0                      | BP       |
| 78704 (-)           | 33                 | 5.0                      | 27327    | 14.7                      | BP       |
| 83787 (-)           | 37                 | 5.2                      | 78415    | 16.3                      | BP       |
| 83844 (-)           | 7                  | 2.8                      | 571      | 9.2                       | NP       |
| 86005 (-)           | 32                 | 5.0                      | 26076    | 14.7                      | BP       |
| 89372 (-)           | 28                 | 4.8                      | 11103    | 13.4                      | NP       |
| 89516 (-)           | 19                 | 4.2                      | 2254     | 11.1                      | NP       |
| 91750 (-)           | 25                 | 4.6                      | 5230     | 12.4                      | NP       |
| 91873 (-)           | 10                 | 3.3                      | 654      | 9.4                       | NP       |
| 94467 (-)           | 42                 | 5.4                      | 401925   | 18.6                      | BP       |
| 98274 (-)           | 22                 | 4.5                      | 3986     | 12.0                      | NP       |
| 111807 (-)          | 37                 | 5.2                      | 98477    | 16.6                      | BP       |
| 117430 (-)          | 61                 | 5.9                      | 1078460  | 20.0                      | WP       |
| 117868 (-)          | 72                 | 6.2                      | 27010    | 14.7                      | WP       |
| 118012 (-)          | 25                 | 4.6                      | 3893     | 11.9                      | NP       |
| 118032 (-)          | 12                 | 3.6                      | 767      | 9.6                       | NP       |
| 118087 (-)          | 35                 | 5.1                      | 4998     | 12.3                      | BP       |
| 122069(-)           | 28                 | 4.8                      | 12021    | 13.6                      | NP       |
| 130492 (-)          | 32                 | 5.0                      | 5036     | 12.3                      | BP       |

Table S7
