# Supplementary material for: A Viral Genome Landscape of RNA Polyadenylation from KSHV Latent to Lytic Infection
Source: PubMed Central journal article supplement (PMC3828183; doi:10.1371/journal.ppat.1003749), 2013-11-14
Supplement: ppat.1003749.s013.pdf [file ppat.1003749.s013.pdf]

| <b>PA peaks</b>                                    | <b>All (n=67)</b> | <b>Narrow (n=38)</b> | <b>Broad (n=24)</b> | <b>Wide (n=5)</b> |
|----------------------------------------------------|-------------------|----------------------|---------------------|-------------------|
| <b>Peak size (median, nt)</b>                      | 27                | 17                   | 36.5                | 61                |
| <b>Reads count (median)</b>                        | 14,895            | 4,013                | 62,764              | 425,475           |
| <b>Pearson coefficient (<i>r</i>)</b>              | 0.55              | 0.53                 | 0.63                | 0.89              |
| <b>Spearman coefficient (<i>r<sub>s</sub></i>)</b> | 0.86              | 0.73                 | 0.65                | 0.3               |

**Table S8**
