# Supplementary material for: A Viral Genome Landscape of RNA Polyadenylation from KSHV Latent to Lytic Infection
Source: PubMed Central journal article supplement (PMC3828183; doi:10.1371/journal.ppat.1003749), 2013-11-14
Supplement: ppat.1003749.s014.pdf [file ppat.1003749.s014.pdf]

| pA site (strand) | Sequence 50nt upstream of mapped pA site, <b>PAS</b>           | PAS    |
|------------------|----------------------------------------------------------------|--------|
| 2972 (+)         | UGUGGUAUGUAUUGUACUAAAAGAUACCGACC <b>AAUACA</b> AGACAACUAAUUAU  | AAUACA |
| 7032 (+)         | UGGGCCUUGGAGUUAAGCUGUCACU <b>AAUAAA</b> CGACGUUGAAAUUUUUUUU    | AAUAAA |
| 17073 (+)        | UCCCACCCACACAUUUUGUCUUUUAUUGCUUUUCA <b>AAUAAA</b> ACGGUGUUCUGU | AAUAAA |
| 25116 (+)        | GUCAAAAAACUUUAAAAACAUCGUUAUACCAAUUAC <b>AAUAAA</b> AACCACACC   | AAUAAA |
| 25192 (+)        | GUGUUAGUGACCCACUGUACACAAGCCGUGUCGUUAUUGUUAUAGG                 | N/D    |
| 25441 (+)        | CGGCUAUUCUGUCCCAUGAGCUCUUG <b>AAUAAA</b> CAAUUGUUUACCGAG       | AAUAAA |
| 28925 (+)        | CGCGGUCUGGAGCUCUCCAUAAGCCCGCAGAACAAAAGCUGCGAUUUGCC             | N/D    |
| 29277 (+)        | GUGUAUCUUUUGGUGCGUUGUGAAGCAUUUUAAAAUUGCUUUUJAGAUUG             | N/D    |
| 29740 (+)        | UACCAUAACGUAAUGCAACUUACAACUA <b>AAUAAA</b> GGUCAUUGUUUAUUC     | AAUAAA |
| 30749 (+)        | UAGAGGGUUGCAUGUUUAUACAACAA <b>CAUAAA</b> CAUAAAUGAACAUUGUU     | CAUAAA |
| 33455 (+)        | UGCUGGUUCAGGAUUUCGAUAUUCU <b>AAUAAA</b> CCUACUGCCUGUCAGAUU     | AAUAAA |
| 39329 (+)        | UACAGACUGUUUCCAUCUUUUUAGACGGUC <b>AAUAAA</b> AGCUGAGAUUUU      | AAUAAA |
| 48779 (+)        | UUCUAAAUUUUA <b>AAUAAA</b> GGUGUGUCACUGGUUACACCAGAUUAAAAAC     | AAUAAA |
| 54095 (+)        | GUCUGUAAAACACUGUUUGGAGUUUCA <b>AAUAAA</b> CGAAGUACUGCUUAAA     | AAUAAA |
| 58875 (+)        | AUAUCCCGCAUUAAAAAGAAGAAAA <b>AAUAAA</b> GAAACAUUUUUUUAAAG      | AAUAAA |
| 62559 (+)        | UUCUCCAGGUGCUUGGUAAGAUGGUUACAC <b>AAUAAA</b> AAAUGUUUACUGG     | AAUAAA |
| 67318 (+)        | CUCUUUAGACACUGAUGUGUUUGG <b>AAUAAA</b> GCAUGAGUCACUAGACACC     | AAUAAA |
| 76738 (+)        | UAGUGUAACACAAAACCAUAAAAGUA <b>AAUAAA</b> CGUUUUUUGUUCACAU      | AAUAAA |
| 78708 (+)        | AUUCGAUCCCGCAACCCACAGCAUCCCCCA <b>AAUAAA</b> AAAACGAGUGUACA    | AAUAAA |
| 78777 (+)        | UGUUCGAUUCAUUACUGGUACAGAG <b>AAUAAA</b> GCCAACCUAUGUCGAACC     | AAUAAA |
| 83636 (+)        | GUAACUCACGUAGCCUUUCUCU <b>AAUAAA</b> CAAGCUACCUGCAAACUUAACA    | AAUAAA |
| 111911 (+)       | CGUCCUUGGCGGAGACGGUUUGACAG <b>AAUAAA</b> GAAGUGGUACUUUGACUC    | AAUAAA |
| 117421 (+)       | GCUCUUAUGCAACUGACCAUGUUCAGGUGGU <b>AAUAAA</b> GCAUUAUAAACGA    | AAUAAA |
| 130545 (+)       | CUAUGUAUUUGUUUUUAUUGCG <b>AAUAAA</b> UGAGGGGUCUGAUCCCAAAAG     | AAUAAA |
| 10572 (-)        | GCUCGAUGGCCUUGAAGUCUAUGUUUUG <b>AAUAAA</b> GGAUAGAUUCAGGGCG    | AAUAAA |
| 17181 (-)        | CACUAAUUAUCUUUGCGUGUCUAGAC <b>AAUAAA</b> GAUUAACUGUCUACAGUC    | AAUAAA |
| 17227 (-)        | ACGUCCACGAUAAAGUAAAGAGCGACGUGA <b>CAUAAA</b> AUUUCUUUAACACU    | CAUAAA |
| 18593 (-)        | CGUUCGGCUGUUUCGUCUGCCCUUAGUUU <b>AAUAAA</b> AGUUAUUAAGAGC      | AAUAAA |
| 21326 (-)        | ACUCUACUGCAAAAUUGUCUUGU <b>AAUAAA</b> UGUAUUAAGACAC            | AAUAAA |
| 25547 (-)        | GGCCUGUGCCCAAUCUGUCCUC <b>AAUAAA</b> AACAAGUAGCUGUUGACUUUC     | AAUAAA |
| 26892 (-)        | GGGAUCCACUCAGGUGUUUUC <b>AAUAAA</b> GCUGUUGUGUUUUUCUCUCAU      | AAUAAA |
| 29376 (-)        | GCUCCACGUCGCCGCACACCACUUUAGUCCAUGUUUCUACACGACUUUG              | N/D    |
| 29447 (-)        | AGCAAACAACAAUUAUAGCCUGGAACUCCAACACAACAUACACAUUA                | N/D    |
| 29516 (-)        | CCCAGCCAAAACCCGUAUUCUUAUGUACACAACGCUUUUCACUACAAGA              | N/D    |
| 29558 (-)        | GCCGUCUGGUCACUGGAGGUGUCCGGUCCGAACAAGGAAAAACCCAGCCA             | N/D    |
| 29615 (-)        | CGUUAAAUUGUCAAAAAGUAUAACAUGUUUUC <b>AAUUAU</b> CACUGGGAUAA     | AAUUAU |
| 30741 (-)        | CUACCCUACUCCCGUUUUGAAAA <b>AAUAAA</b> CAUACGUUUUGAACAAUG       | AAUAAA |
| 32518 (-)        | UGUACAUCCUGCAGAGAACCAAUG <b>AAUAAA</b> ACGCAGCUCUUGGGCGUGG     | AAUAAA |
| 36119 (-)        | CCAUAACCCUCUAAGUAAAGCA <b>AAUAAA</b> CAUUCUGUAGUCCACGGUC       | AAUAAA |
| 39229 (-)        | AAAGAAAGUAGUAACCCCGAGAACCC <b>AAUAAA</b> AGAGAGAAUUAAGAAAC     | AAUAAA |
| 49344 (-)        | AGACACAUGUACAAGCCAUUACCCAC <b>AAUAAA</b> AGCACAGCGCUCAAUU      | AAUAAA |
| 55654 (-)        | CCUCCUGUUGAUGUUUGCCUCCAGAGCCGACUU <b>AAUAAA</b> CUCUCUUUAG     | AAUAAA |
| 58884 (-)        | AUCCCGUUUAUUUUUACCCACCACGG <b>AAUAAA</b> AUACGUACAGAAAACC      | AAUAAA |
| 62410 (-)        | CAUUGUUUCCCUUUUUUCA <b>AAUAAA</b> GAUAAAAGCCUGGUCCAGGCCUCU     | AAUAAA |
| 67323 (-)        | AACUGGCCUGGCGGACUGAU <b>AAUAAA</b> AGAAUGGUGUCAAUACAGACC       | AAUAAA |
| 71615 (-)        | CACCAUUGUAAACACGCAUUGUUCAGUAUAC <b>AAUAAA</b> AAGGUCGAUCUUU    | AAUAAA |
| 73485 (-)        | CCUGCCACGUACU <b>AAUAAA</b> CGCCGGUCUGUACCCGAUGGGUUAAAGGGG     | AAUAAA |
| 74635 (-)        | GUUAAA <b>AAUAAA</b> CUGCCUGGGAAGUUAACGCAGGCACAGACGCCCUUGCG    | AAUAAA |
| 76706 (-)        | AAGAGUACCACUCUUUAUCAUGUGAAC <b>AAUAAA</b> CACGUUUUUUACUUUU     | AAUAAA |
| 78704 (-)        | UUCUCUGUACCAGUAAUGAAUCGAACA <b>AAUAAA</b> ACAUUGGCGUGUGU       | AAUAAA |
| 83787 (-)        | UAUUGUUUAGGGAGGGAGUAUAUCAUAC <b>AAUAAA</b> GAGACCAAAAUAUUG     | AAUAAA |
| 83844 (-)        | UAAUGCCGAAGCCGUUAUGGGGAUGCCA <b>AAUAAA</b> UAAUACA AAAUUGCC    | AAUAAA |
| 86005 (-)        | AAACCGGAUGUAAUCUUGUAGUCCA <b>AAUAAA</b> CCAGACACGACAUUUCGCC    | AAUAAA |
| 89372 (-)        | ACCUGUGAUUAUGUUAACCCGGAUCGAUA <b>AAUAAA</b> AUAGAAAGCAUUUG     | AAUAAA |
| 89516 (-)        | GCUGUGGUUAAAGUGAAAGUGUGAGGAU <b>AAUAAA</b> CACUACAUUUCACCC     | AAUAAA |
| 91750 (-)        | CACUGAGUGGACAU <b>AAUAAA</b> GGUUAAGCGCCACCUGUGGCCUGCAAAAU     | AAUAAA |
| 91873 (-)        | CCUUUGUCUUACCGCCUCCGUUUUGCACU <b>AAUAAA</b> UAUCAUUGCCGUUAG    | AAUAAA |
| 94467 (-)        | UAUGUAUCUACUAGCUCUCCUGUCGGU <b>AAUAAA</b> UAAAGUUGUUGCUAAUUG   | AAUAAA |
| 98274 (-)        | UUGCUAAUUAUCUCCAAGGUCACC <b>AAUAAA</b> GAAGAGGUGUUGAGGCC       | AAUAAA |
| 111807 (-)       | AUAGGGCGGCCACUUUUUGUUUGAUGCGUCU <b>AAUAAA</b> ACUAAUCAGUGUU    | AAUAAA |
| 117430 (-)       | GUACAUUGCAGCGUGGCCACAUGUUCAAAAC <b>AAUAAA</b> CAGAUUAAAAG      | AAUAAA |
| 117868 (-)       | AGCUAGCGUGCCUCCCAAAGAGUGUCAGUA <b>AAUAAA</b> AUACA AAAACAC     | AAUAAA |
| 118012 (-)       | CCGGAUGUUU <b>ACUAAA</b> UGGGUGGCGCUGGAGGCUUGGGCGAUUACACC      | ACUAAA |
| 118032 (-)       | UGUUUGUGGAGUUCUAGUCCCGGAUGUGU <b>ACUAAA</b> UGGGUGGCGCUGG      | ACUAAA |
| 118087 (-)       | UGGUGCCUCCUCCUCCUCCACUCCA <b>AAUAAA</b> UCCAAUGCAUGGAUAGAGGCUU | N/D    |
| 122069 (-)       | UCCGUAGAAUGUAUGUACUGAUUU <b>AAUAAA</b> CACUACAAGUUUUGUAAG      | AAUAAA |
| 130492 (-)       | UUUGGAUCAGACCCUCAUUUAUCGCAU <b>AAUAAA</b> ACAAUACAUAUGUC       | AAUAAA |

Table S9
