# Supplementary material for: A Viral Genome Landscape of RNA Polyadenylation from KSHV Latent to Lytic Infection
Source: PubMed Central journal article supplement (PMC3828183; doi:10.1371/journal.ppat.1003749), 2013-11-14
Supplement: ppat.1003749.s015.pdf [file ppat.1003749.s015.pdf]

|              | PA peaks  |           |           |          |           |           |
|--------------|-----------|-----------|-----------|----------|-----------|-----------|
| PAS          | All       | Narrow    | Broad     | Wide     | Top10     | Bottom 10 |
| AAUAAA       | 46        | 24        | 18        | 4        | 10        | 6         |
| AUUAAA       | 6         | 3         | 3         | 0        | 0         | 0         |
| ACUAAA       | 2         | 2         | 0         | 0        | 0         | 1         |
| CAUAAA       | 2         | 2         | 0         | 0        | 0         | 1         |
| AAUACA       | 1         | 1         | 0         | 0        | 0         | 0         |
| AAUAUA       | 1         | 1         | 0         | 0        | 0         | 0         |
| UAUAAA       | 1         | 1         | 0         | 0        | 0         | 1         |
| N/D          | 8         | 4         | 3         | 1        | 0         | 1         |
| <b>Total</b> | <b>67</b> | <b>38</b> | <b>24</b> | <b>5</b> | <b>10</b> | <b>10</b> |
