# Supplementary material for: A Viral Genome Landscape of RNA Polyadenylation from KSHV Latent to Lytic Infection
Source: PubMed Central journal article supplement (PMC3828183; doi:10.1371/journal.ppat.1003749), 2013-11-14
Supplement: ppat.1003749.s016.pdf [file ppat.1003749.s016.pdf]

| Gene     | pA site    | Name     | Position (nt) | Sequence                         | Product size (bp)* |
|----------|------------|----------|---------------|----------------------------------|--------------------|
| ORF27    | 48779 (+)  | oVM232   | 48454-48478   | 5'-TCAGACCGCATCCCGTAACCACACT-3'  | 326                |
| ORF62    | 98274 (-)  | oVM236   | 98989-98665   | 5'-TG TTCAGGGGTTGGCGGATGTGTTT-3' | 416                |
| T1.5     | 25116 (+)  | oVM209   | 24907-24928   | 5'-AACCTGTTGCCATGTATGGCGA-3'     | 210                |
|          | 25192 (+)  |          |               |                                  | 286                |
|          | 25441 (+)  |          |               |                                  | 535                |
| ORF54    | 78708 (+)  | oVM233   | 78392-78416   | 5'-CCAGATTGTGTTTGTGGAACGCAGA-3'  | 317                |
|          | 78777 (+)  |          |               |                                  | 387                |
| K2       | 17181 (+)  | oVM207   | 17693-17671   | 5'-GGGTATTCTAGAGCCCGCTGCTA-3'    | 513                |
|          | 17227 (+)  |          |               |                                  | 467                |
| K11      | 91750 (-)  | oVM235   | 92105-92081   | 5'-CGTGGAGCGACATAATCGAGAACCT-3'  | 356                |
|          | 91873 (-)  |          |               |                                  | 233                |
| K12      | 117430 (-) | oVM237   | 118128-118104 | 5'-CCTCCCTCCTCACTCCAATCCCAAT-3'  | 699                |
|          | 117868 (-) |          |               |                                  | 260                |
| vnct rep | 29376 (-)  | oVM234   | 29770-29746   | 5'-ACGCAAGTCAAGACACAAGTCAGGA-3'  | 395                |
|          | 29447 (-)  |          |               |                                  | 324                |
|          | 29516 (-)  |          |               |                                  | 255                |
|          | 29558 (-)  |          |               |                                  | 213                |
|          | 29615 (-)  |          |               |                                  | 156                |
| as-vIL6  | 18200 (+)  | oJGK22   | 17486-17504   | 5'-CTTCGTCAGAAGCTCCATG-3'        | 715                |
| as-ORF21 | 36119 (-)  | oVM247   | 36608-36584   | 5'-CTGGAGAGGGTGAGAATGGCGACCA-3   | 490                |
|          |            | oVM248** | 36415-36391   | 5'-GCTGCATCATTTCGAGGATAGCGGT-3'  | 297                |
| as-ORF34 | 55654 (-)  | oVM250   | 56133-56111   | 5'-TGCCATGTGGACGCCAGGGTCT-3'     | 480                |
|          |            | oVM251** | 55937-55915   | 5'-GCGTCGACCAGGGCGTCAATGTC-3'    | 284                |
| as-K8    | 74635 (-)  | oVM253   | 75094-75070   | 5'-CCACTTTGGGAAGGCGCTGTAAGGT-3'  | 460                |
|          |            | oVM254** | 74953-74929   | 5'-GGTTGCCCGTTGAGGCTTAGATCTT-3'  | 319                |

\* Actual 3'RACE products contain additional adaptor sequence (77 nts for primary and 55 nts for nested 3'RACE)

\*\* Primers used in nested 3'RACE
